# Supplementary material
Source: PubMed Central journal article supplement (PMC4465364)

**Supplemental Table 1- Characterization of iPax7 iPS clones.**

| <i>TTF</i><br>Clone # | <i>SSEA-1</i> | <i>AP</i><br>staining | <i>Nanog</i><br>staining | <i>Morphology</i> | <i>EB</i><br>formation | <i>Paraxial</i><br><i>mesoderm/myogenic</i><br><i>differentiation</i> | <i>Teratoma</i><br>formation | <i>In vivo</i><br><i>regen.</i> | <i>Karyotype</i><br><i>report</i> |
|-----------------------|---------------|-----------------------|--------------------------|-------------------|------------------------|-----------------------------------------------------------------------|------------------------------|---------------------------------|-----------------------------------|
| 1                     | 97.2          | Typical               | Typical                  | Typical           | Typical                | Efficient                                                             | yes                          | +/-                             | 10 of 12<br>normal <sup>(a)</sup> |
| 2                     | 96.9          | Typical               | Typical                  | Typical           | Typical                | Efficient                                                             | yes                          | yes                             | 20 of 20<br>normal                |
| 3                     | 97.6          | Typical               | Typical                  | Typical           | small                  | Limited                                                               | ND                           | ND                              | ND                                |
| 4                     | 87.1          | Typical               | Typical                  | Typical           | Typical                | Limited                                                               | ND                           | ND                              | ND                                |
| 6                     | 97            | Typical               | Typical                  | Typical           | small                  | Limited                                                               | ND                           | ND                              | ND                                |
| 9                     | 94.1          | Typical               | Typical                  | Typical           | Typical                | Limited                                                               | ND                           | ND                              | ND                                |
| 10                    | 97.2          | weak                  | weak                     | Typical           | Typical                | Limited                                                               | ND                           | ND                              | ND                                |
| 11                    | 93.6          | Typical               | weak                     | ND                | ND                     | ND                                                                    | ND                           | ND                              | ND                                |
| 15                    | 79.9          | Weak                  | Typical                  | ND                | ND                     | ND                                                                    | ND                           | ND                              | ND                                |
| 24                    | 86.9          | Typical               | weak                     | ND                | ND                     | ND                                                                    | ND                           | ND                              | ND                                |

| <i>ICE</i><br>Clone # | <i>SSEA-1</i> | <i>AP</i><br>staining | <i>Nanog</i><br>staining | <i>Morphology</i> | <i>EB</i><br>formation | <i>Paraxial</i><br><i>mesoderm/myogenic</i><br><i>differentiation</i> | <i>Teratoma</i><br>formation | <i>In vivo</i><br><i>regen.</i> | <i>Karyotype</i><br><i>report</i> |
|-----------------------|---------------|-----------------------|--------------------------|-------------------|------------------------|-----------------------------------------------------------------------|------------------------------|---------------------------------|-----------------------------------|
| 1                     | 90.2          | weak                  | Typical                  | Typical           | small                  | Limited                                                               | ND                           | ND                              | ND                                |
| 3                     | 88.7          | Typical               | Typical                  | Typical           | Typical                | Efficient                                                             | yes                          | +/-                             | 1 of 10<br>normal <sup>(b)</sup>  |
| 4                     | 93.9          | Typical               | Typical                  | Typical           | Typical                | Limited                                                               | ND                           | ND                              | ND                                |
| 7                     | 94.4          | Typical               | Typical                  | Typical           | Typical                | Efficient                                                             | yes                          | Yes                             | 20 of 20<br>normal                |
| 8                     | 95.3          | weak                  | Typical                  | Typical           | Typical                | Limited                                                               | ND                           | ND                              | ND                                |
| 9                     | 96            | Typical               | weak                     | Typical           | Typical                | Limited                                                               | ND                           | ND                              | ND                                |
| 12                    | 95.2          | Typical               | Typical                  | Typical           | small                  | Limited                                                               | ND                           | ND                              | ND                                |
| 15                    | 98.2          | Typical               | Typical                  | Typical           | Typical                | Efficient                                                             | yes                          | +/-                             | 8 of 15<br>normal <sup>(c)</sup>  |
| 16                    | 98            | weak                  | weak                     | Typical           | Typical                | Limited                                                               | ND                           | ND                              | ND                                |

\* Annotation in red describes the iPS clones that were selected for the *in vivo* transplantation studies. These clones were also assayed for teratoma formation and karyotype analysis.

**ND:** not determined

+/-: Weak engraftment/dystrophin restoration without functional recovery

Karyotype abnormalities:

- (a) 2 of 12 had 41 chromosomes including Trisomy for chromosome 6
- (b) 2 of 10 had an abnormal Y, resulting two copies of Y for the cells, and 7 of 10 had 39 chromosomes with loss of the Y
- (c) 1 of 11 had 39 chromosomes with loss of the Y, and 2 of 11 had 37 chromosomes with chromosomes losses and marker chromosome of unknown origin

**A**

iPS morphology

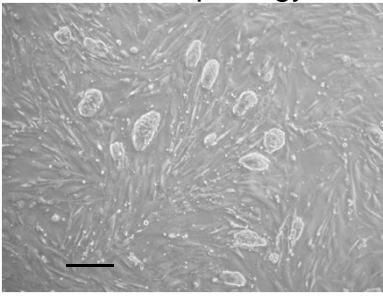**B**

SSEA-1 expression

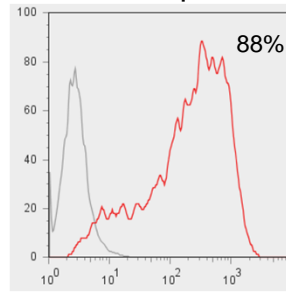**C**

Nanog staining

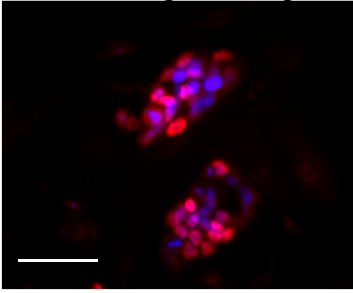**D**

AP staining

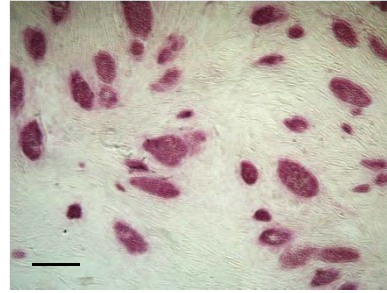**E**

EB morphology

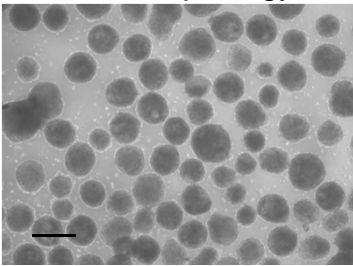**F**

Teratoma formation

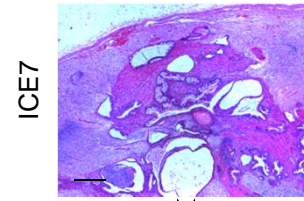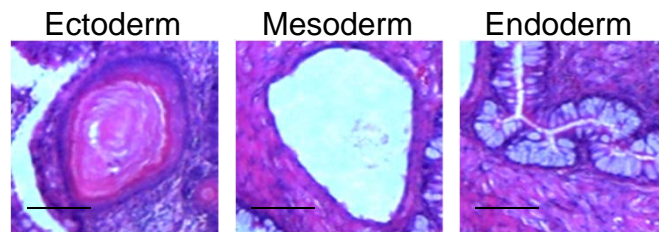

Ectoderm: Keratin pearl  
 Mesoderm: Cartilage  
 Endoderm: Gut epithelium

# Supplemental Figure 2

**A**

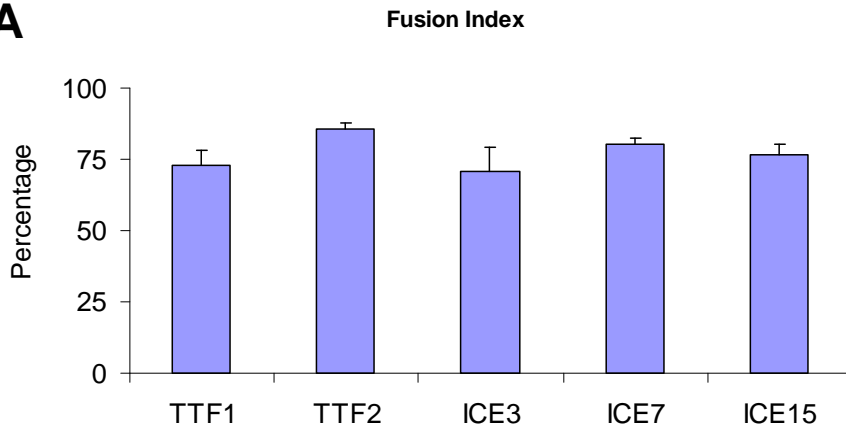

**B**

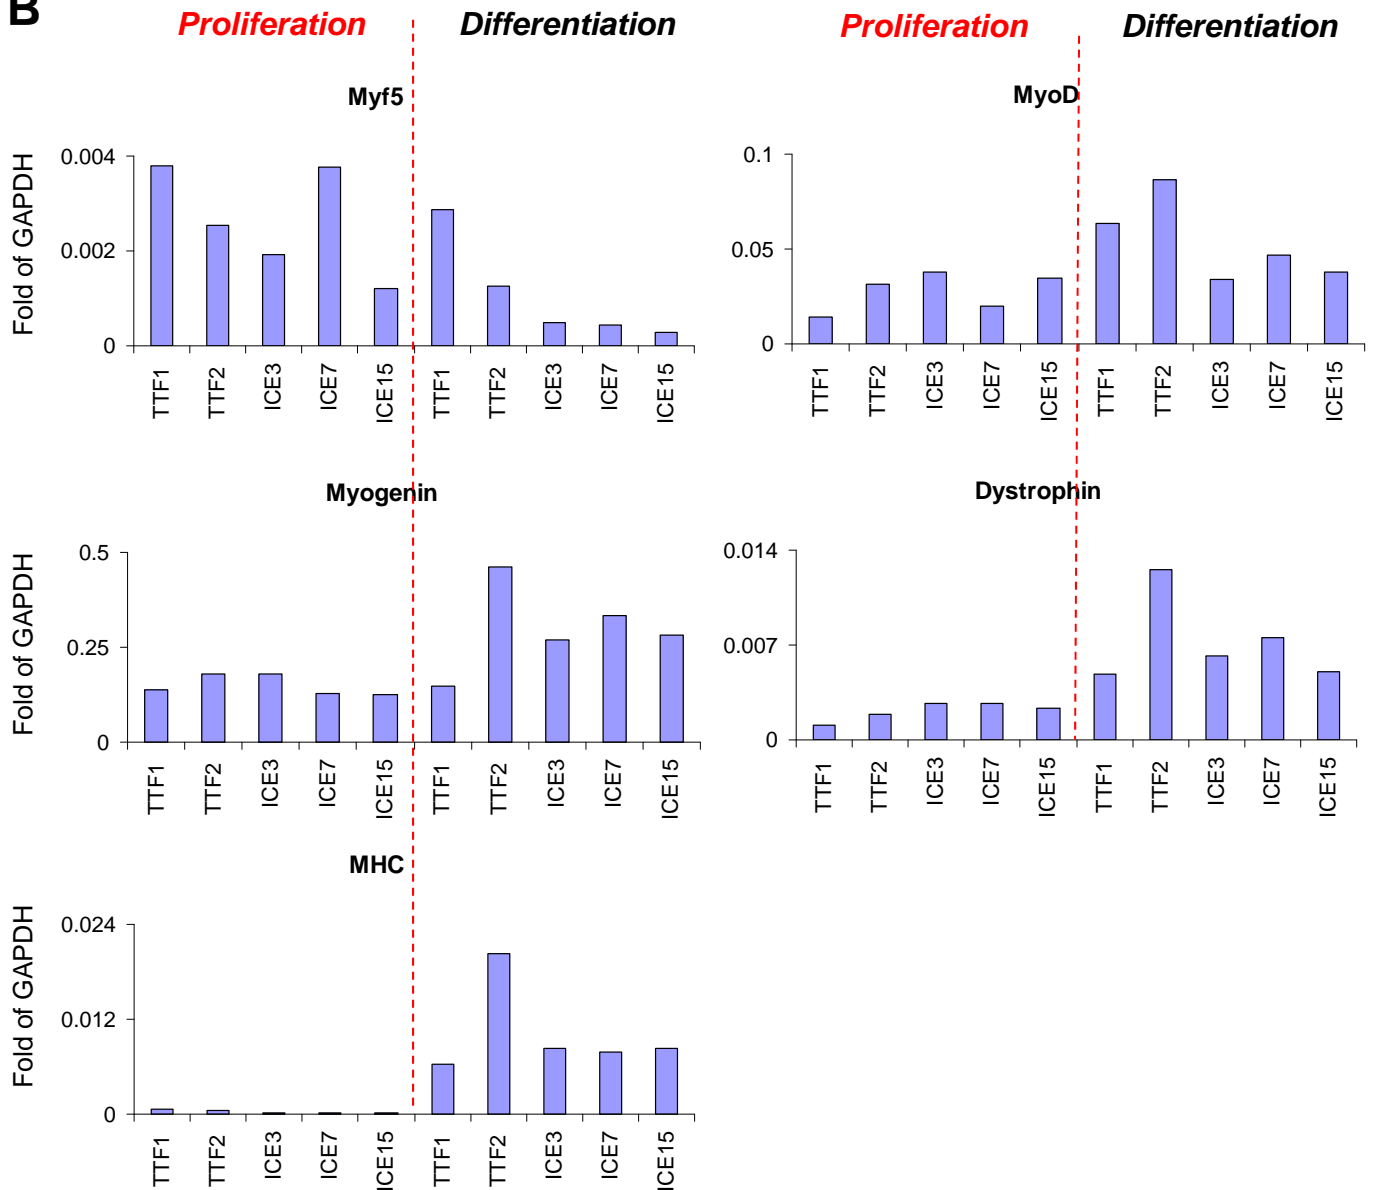

# Supplementary Figure 3

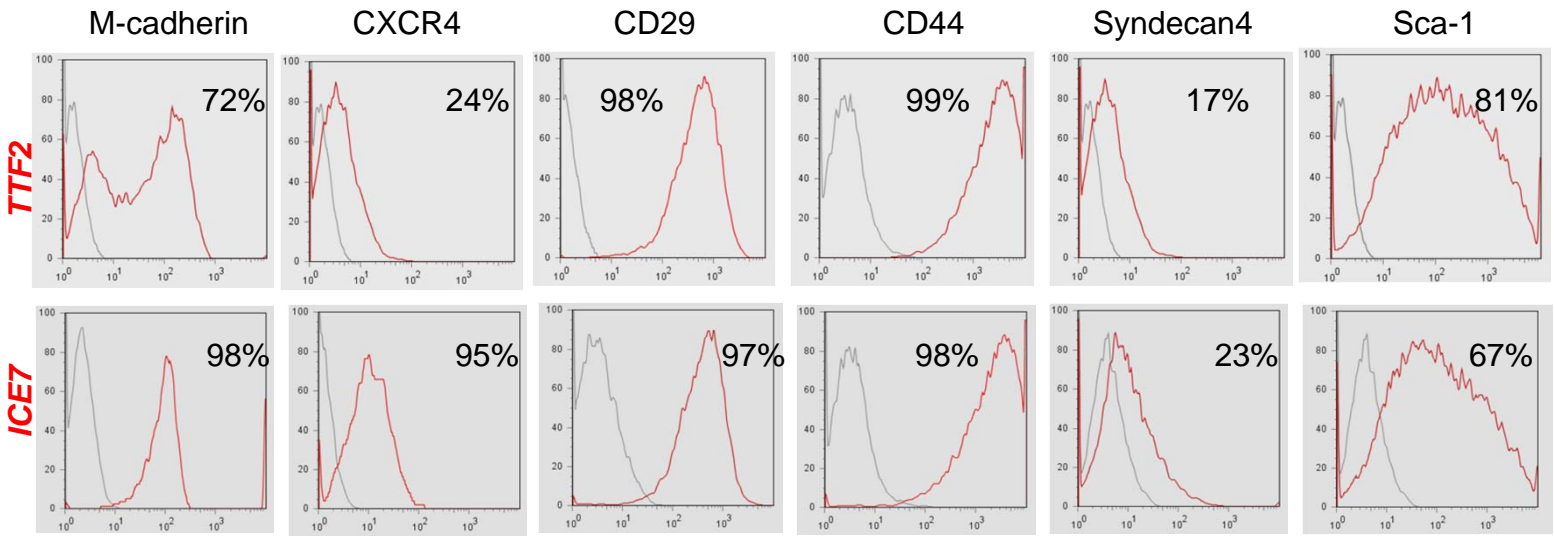

# Supplemental Figure 4

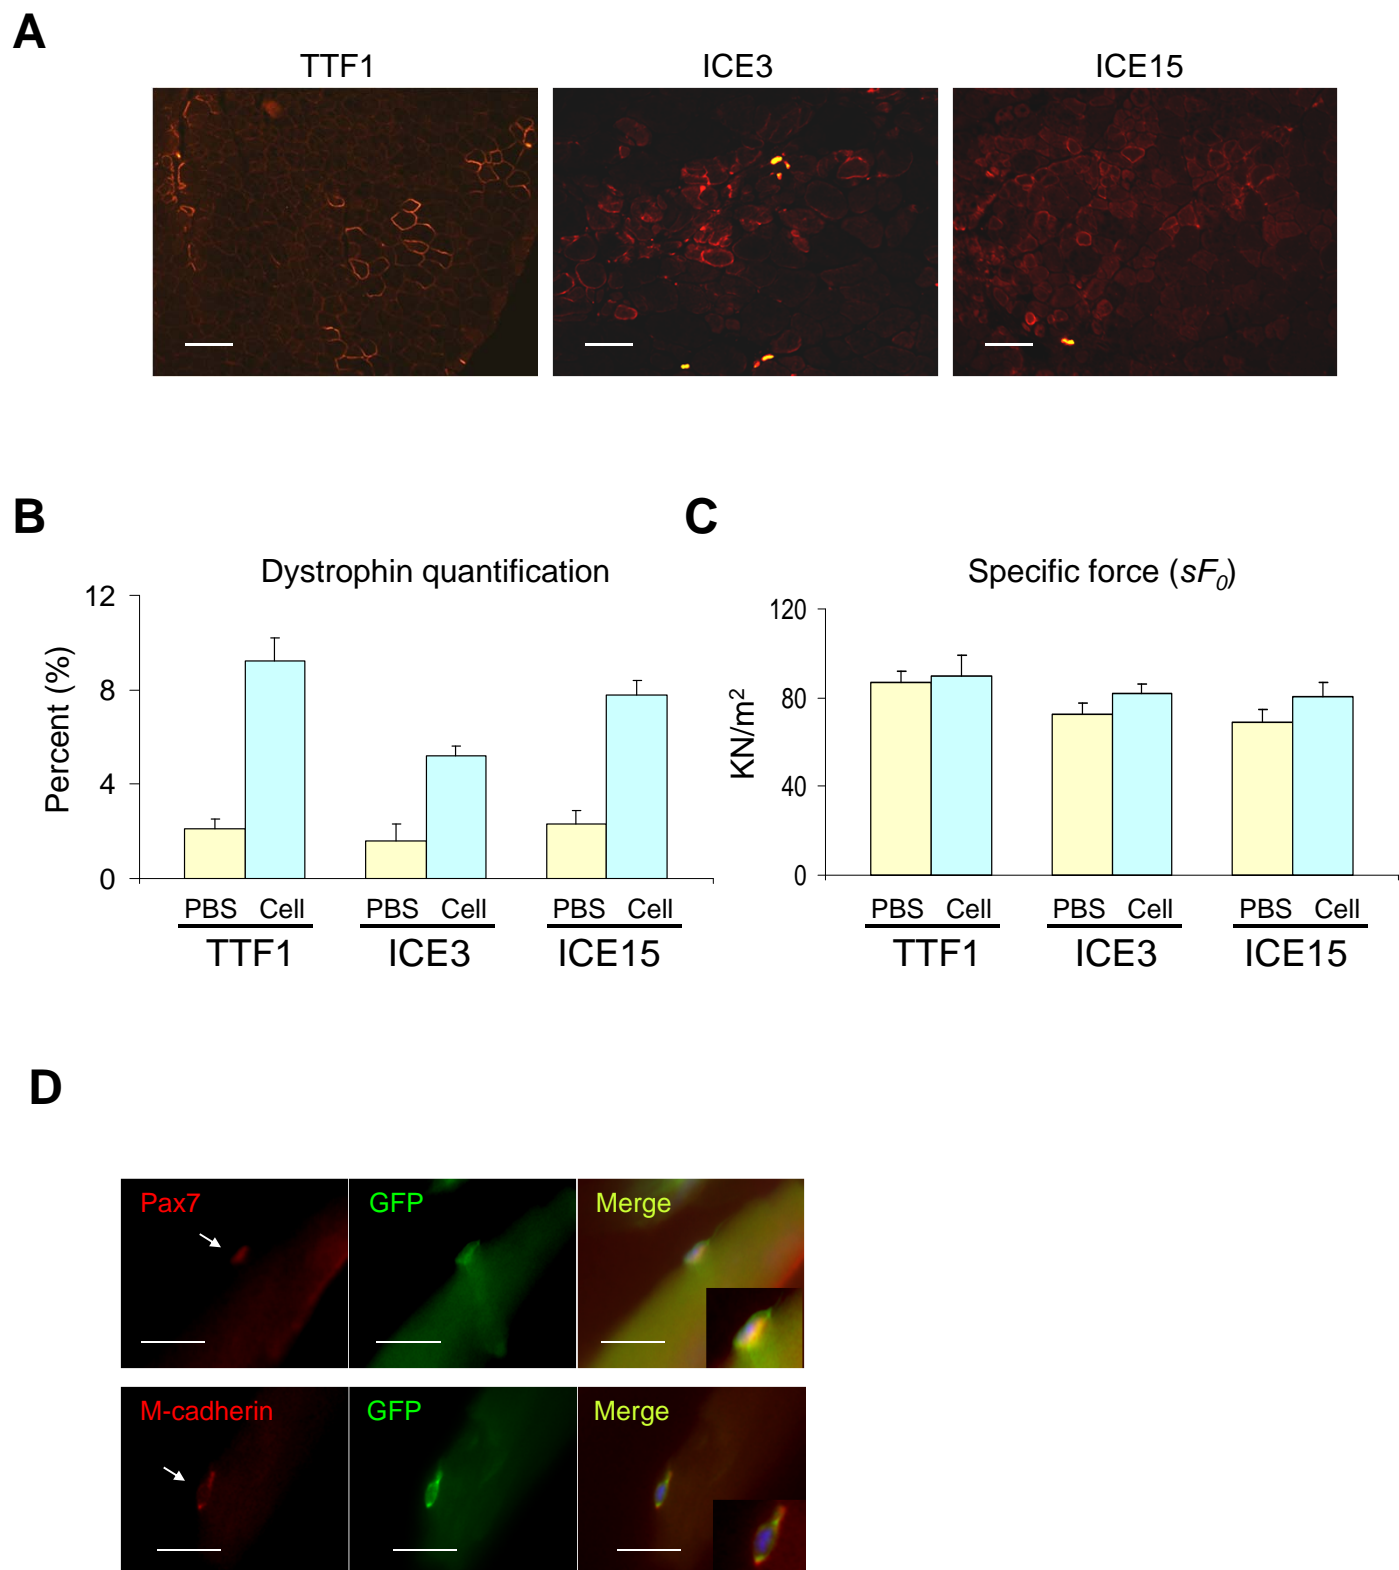

Supplement: NIHMS695479-supplement-supplemental.pdf [file NIHMS695479-supplement-supplemental.pdf]
